# Supplementary material
Source: Springer Nature journal article supplement (https://www.springermedizin.de/resource/supplementary/12865_2008_230_MOESM7_ESM.pdf/9427558)

**A**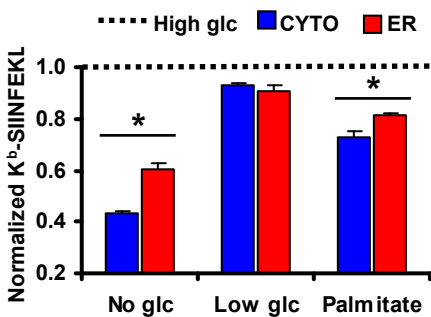**B**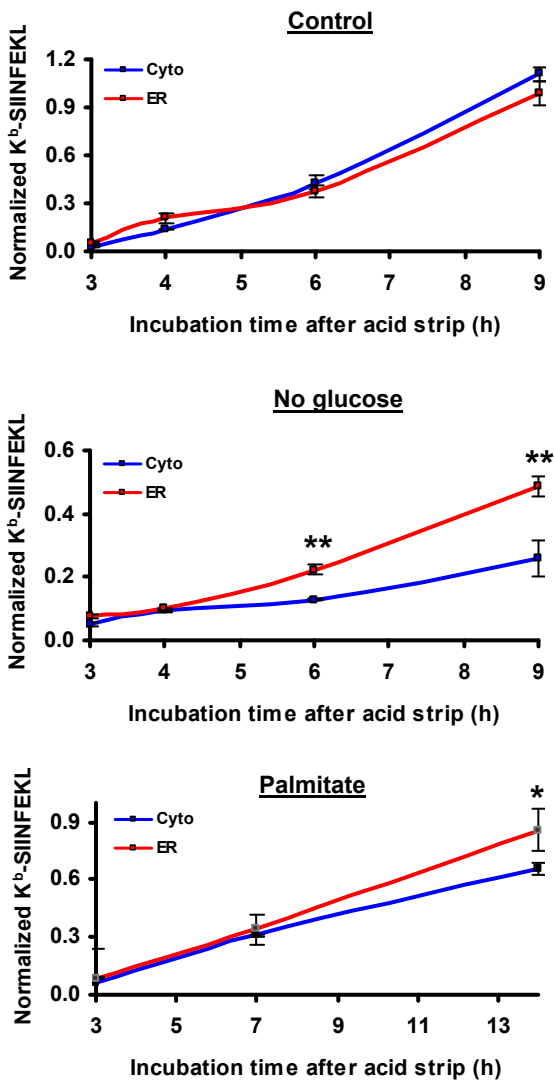

Supplement: MOESM7 [file 9427558]
